# Supplementary material for: Flower-like Ag-decked non-stoichiometric Bi 2 O 3− x /rGO hybrid nanocomposite SERS substrates for an effective detection of Rhodamine 6G dye molecules
Source: Royal Society of Chemistry journal article supplement (doi:10.1039/d4ra01286k), 2024-01-01
Supplement: d4ra01286k1.pdf [file d4ra01286k1.pdf]

## Supporting Information

# Flower Like Ag decked non-stoichiometric $\text{Bi}_2\text{O}_{3-x}/\text{rGO}$ hybrid nano composites SERS substrate for an effective detection of Rhodamine 6G Dye molecules

*Awati Prema Mahadev<sup>a</sup>, C. Kavitha<sup>a\*</sup>, Jil Rose Perutil<sup>b</sup>, Neena S. John<sup>b</sup>, Sudheeksha H.C<sup>c</sup>,*

<sup>a</sup> Department of Chemistry R&D, Physics R&D, Centre for Advanced Materials Research, B.M.S. Institute of Technology & Management, Bangalore-560064, an autonomous under Visvesvaraya Technological University -590018, India

<sup>b</sup> Centre for Nano and Soft Matter Sciences, Shivanapura, Bengaluru – 562162, India

<sup>c</sup> Horiba India Pvt Ltd, IISc Industry unit, Bangalore - 560012, India

**Corresponding Author:** \* E-mail: [gkavitha21@bmsit.in](mailto:gkavitha21@bmsit.in)

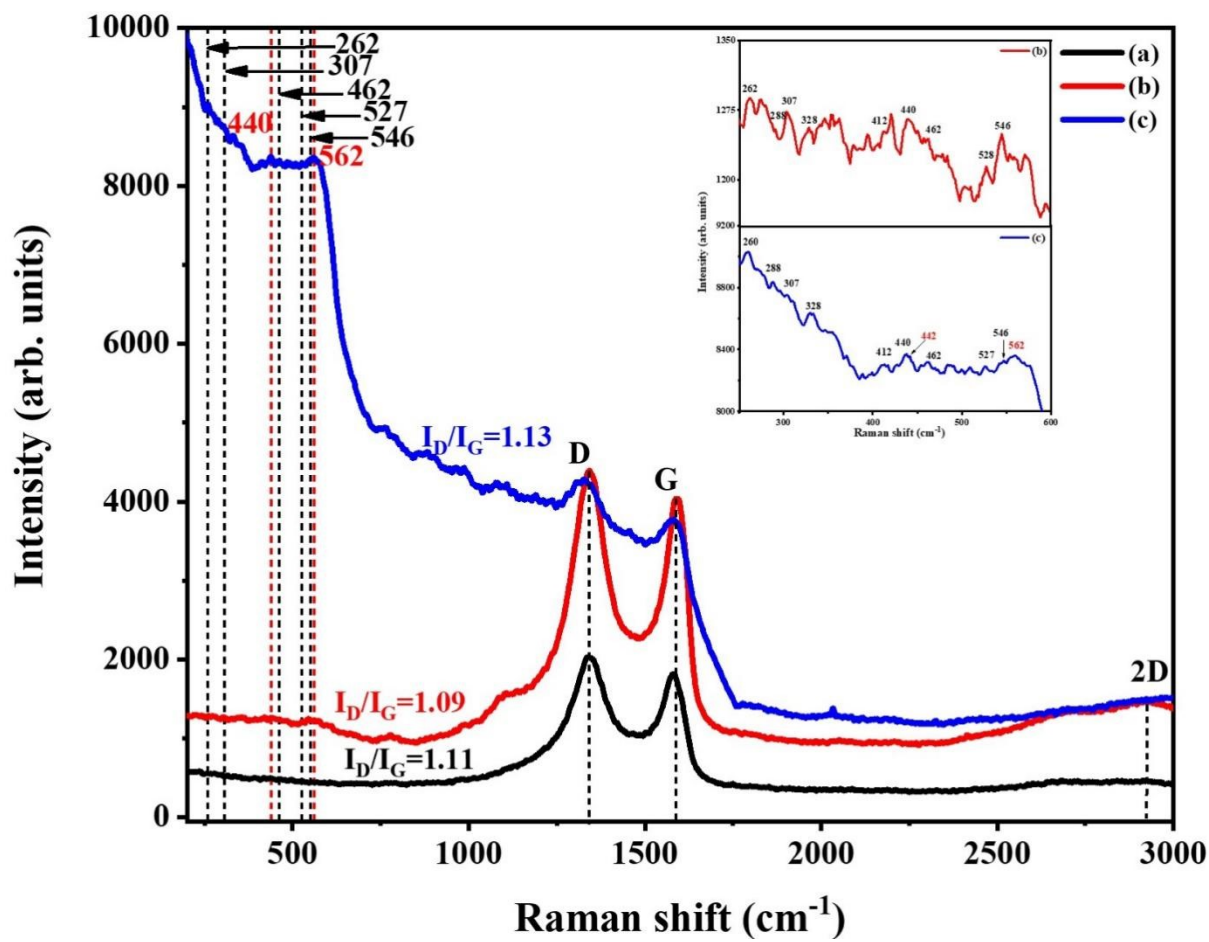

**Figure S1.** Raman spectra of bare (a) rGO, (b) rGO-Bi<sub>2</sub>O<sub>3</sub>/Bi<sub>2</sub>O<sub>2.75</sub> hybrid thin film nano composite and (c) rGO-Ag-Bi<sub>2</sub>O<sub>3</sub>/Bi<sub>2</sub>O<sub>2.75</sub> hybrid thin film nano composite. The inset shows an enlarged view of the characteristic Raman peaks at lower wave number.

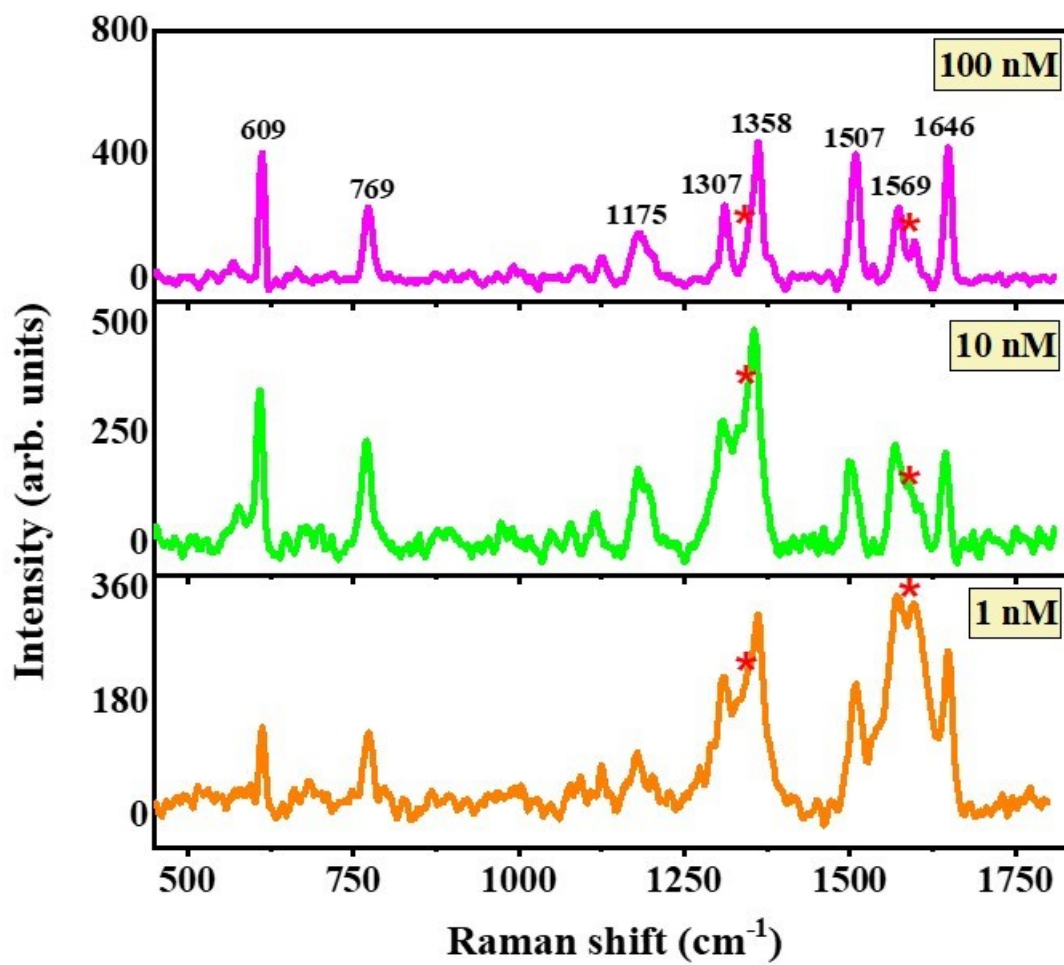

**Figure S2.** SERS spectra for a set of nano molar concentrations of R6G loaded on rGO-Ag- $\text{Bi}_2\text{O}_3/\text{Bi}_2\text{O}_{2.75}$  hybrid thin film nano composite.

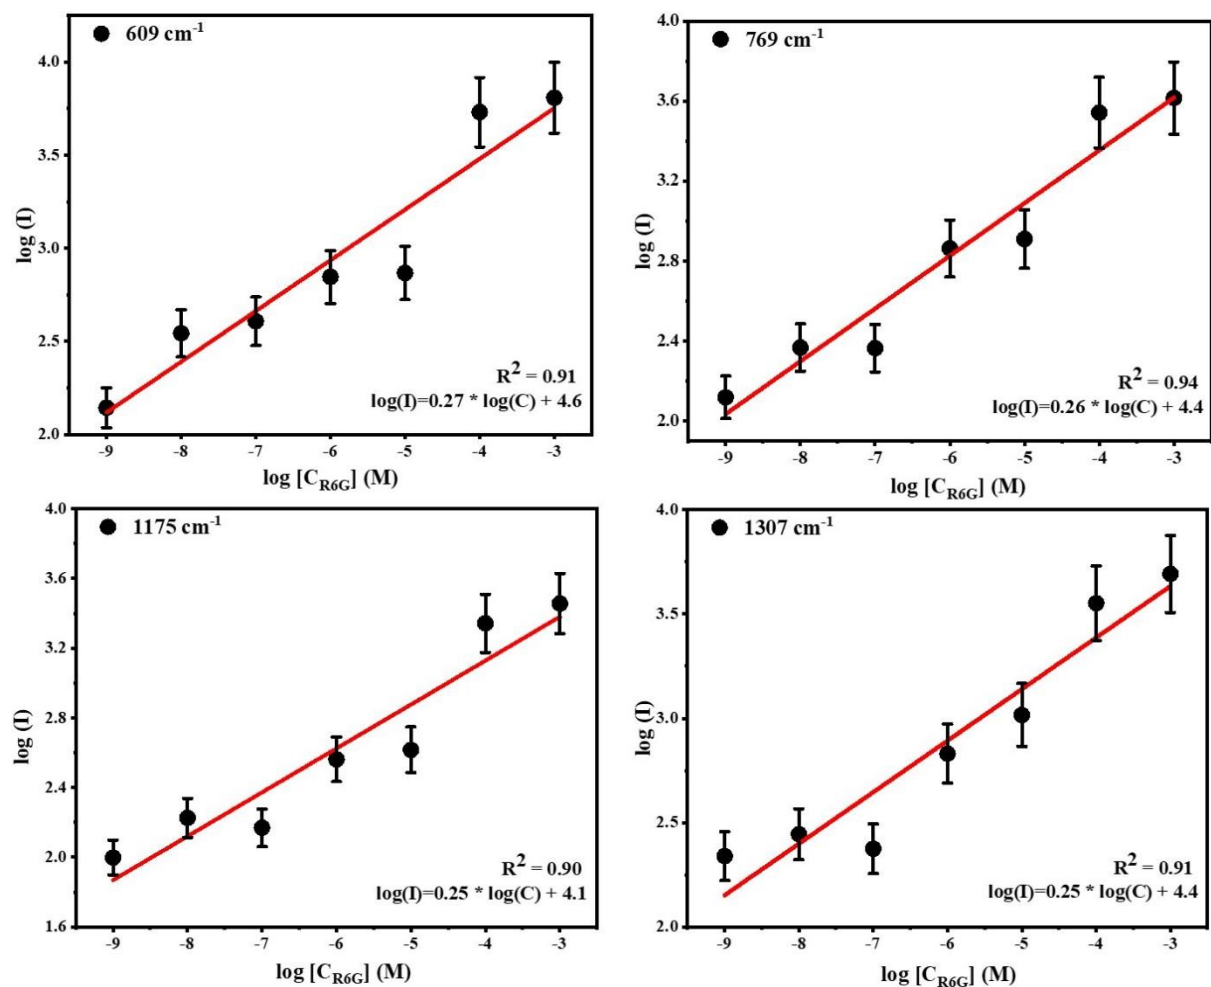

**Figure S3.** Plots presenting linearity correlation of SERS intensity with logarithmic values of R6G molar concentrations ranging from mM to nM adsorbed on rGO-Ag-Bi<sub>2</sub>O<sub>3</sub>/Bi<sub>2</sub>O<sub>2.75</sub> substrate.

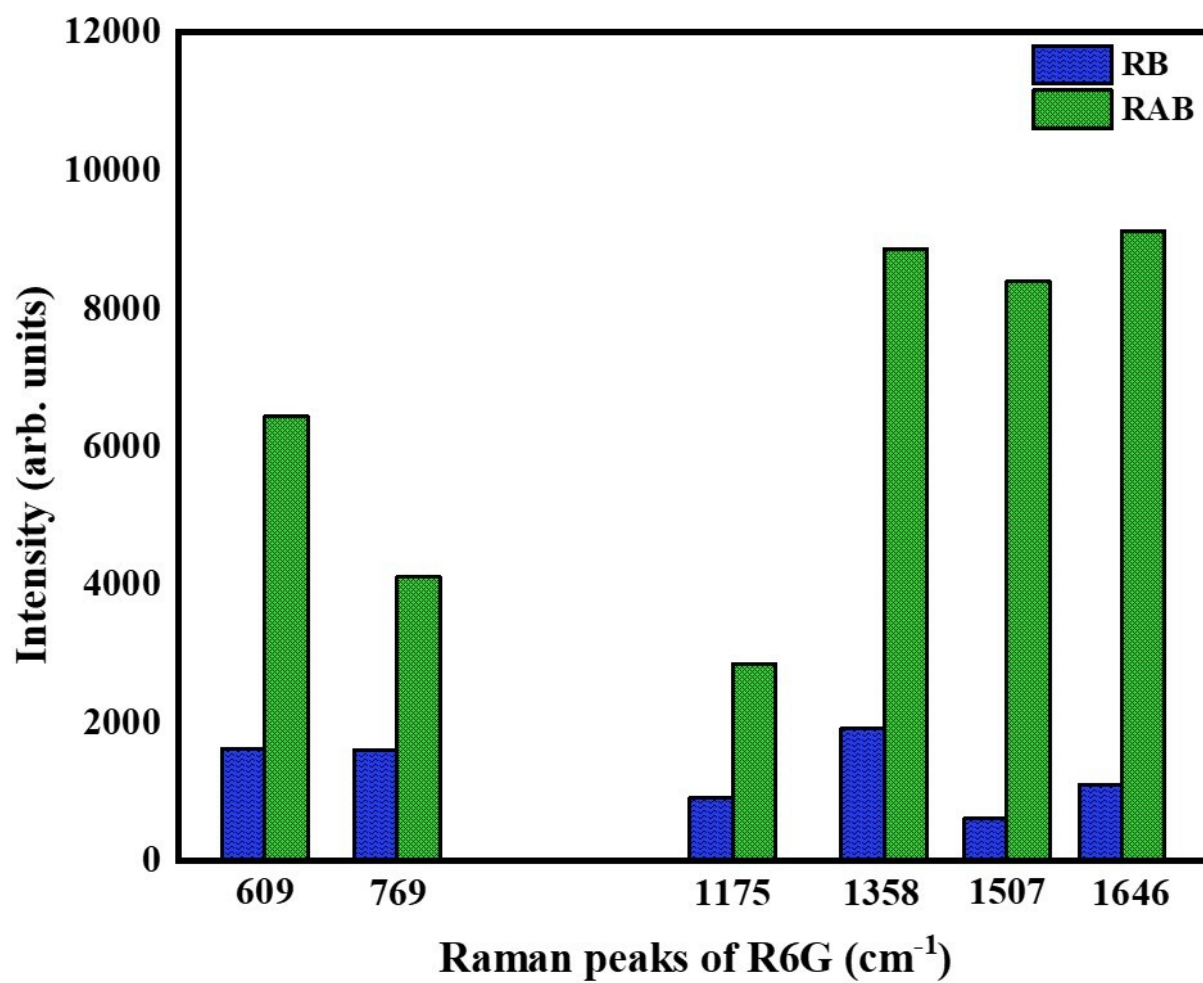

**Figure S4.** Comparative representation of the characteristic peak intensities of 1 mM R6G adsorbed on rGO-Ag-Bi<sub>2</sub>O<sub>3</sub>/Bi<sub>2</sub>O<sub>2.75</sub> (RAB-Green bar) and rGO-Bi<sub>2</sub>O<sub>3</sub>/Bi<sub>2</sub>O<sub>2.75</sub> (RB-Blue bar) respectively.

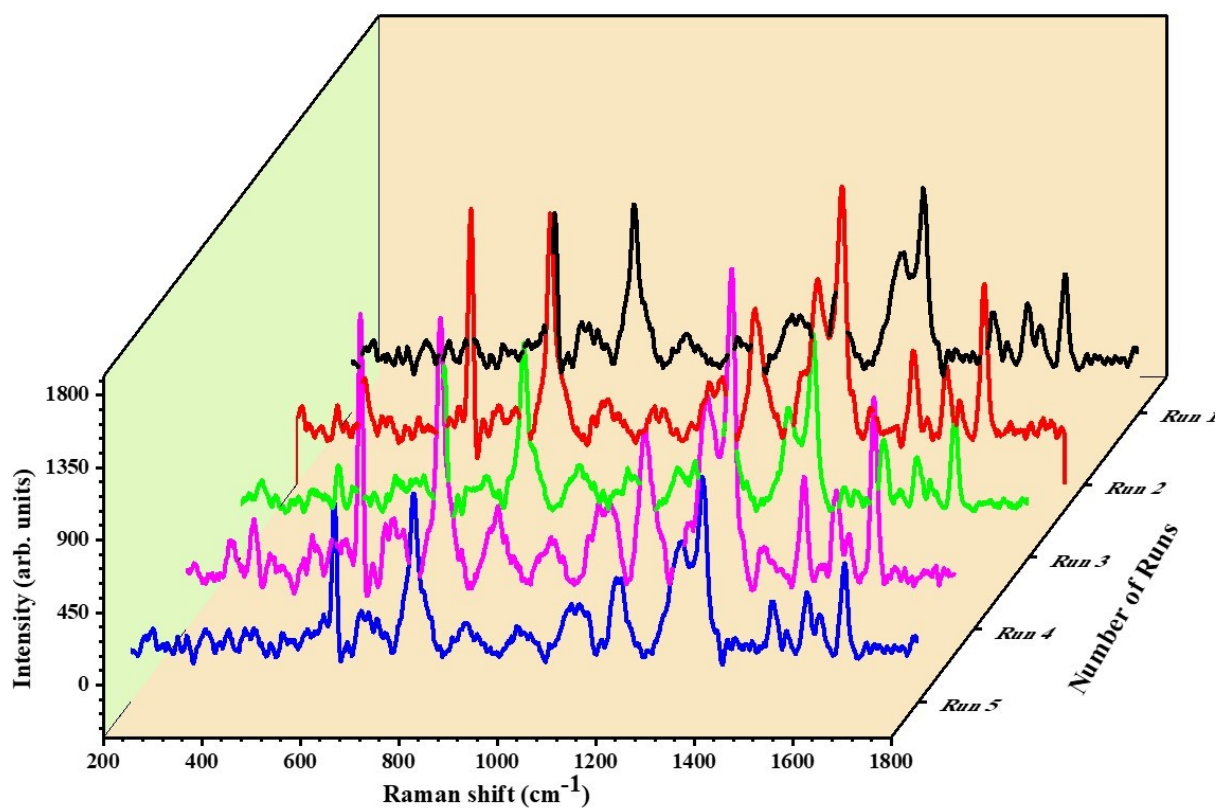

**Figure S5.** Stable and Reproducible SERS spectra of 20  $\mu\text{L}$  of 1mM R6G adsorbed on rGO-Ag-Bi<sub>2</sub>O<sub>3</sub>/Bi<sub>2</sub>O<sub>2.75</sub> hybrid thin films prepared 4 to 5 times under identical condition. The spectra of Run 3 and Run 5 were recorded for three weeks aged substrate.

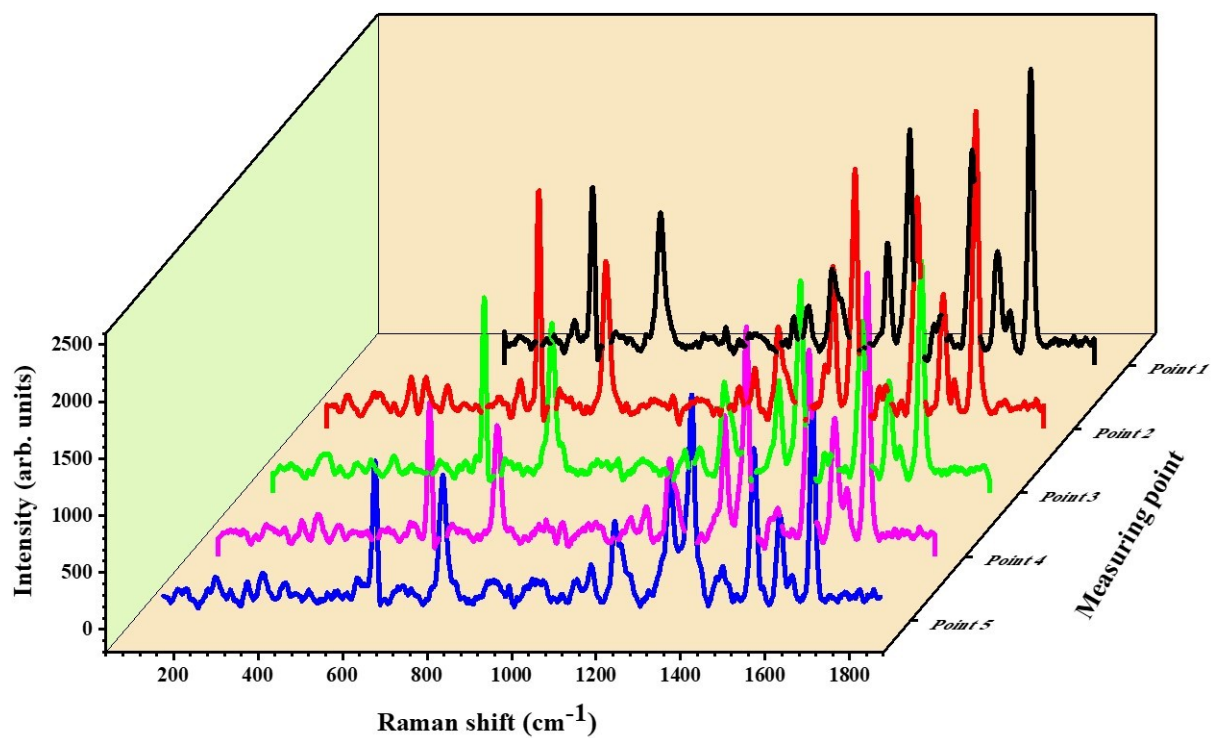

**Figure S6.** Uniform and Repeatable SERS spectra recorded at 5 different points of rGO-Ag-Bi<sub>2</sub>O<sub>3</sub>/Bi<sub>2</sub>O<sub>2.75</sub> hybrid thin film nano composite substrate loaded with 20  $\mu$ L of 1mM R6G.
